# Supplementary material for: A backbone design principle for covalent organic frameworks: the impact of weakly interacting units on CO2 adsorption
Source: Royal Society of Chemistry journal article supplement (doi:10.1039/c7cc01921a), 2017-01-01
Supplement: c7cc01921a1.pdf [file c7cc01921a1.pdf]

## Supplementary Information

### **A backbone design principle for covalent organic frameworks: the impact of weakly interacting units on CO<sub>2</sub> adsorption**

Lipeng Zhai,<sup>a,b</sup> Ning Huang,<sup>a</sup> Hong Xu<sup>a</sup>, Qihong Chen<sup>a</sup> and Donglin Jiang<sup>a\*</sup>

<sup>a</sup>Field of Environment and Energy, School of Materials Science

Japan Advanced Institute of Science and Technology, 1-1 Asahidai, Nomi 923-1292, Japan

<sup>b</sup>Department of Structural Molecular Science, School of Physical Science

SOKENDAI, Hayama 240-0193, Japan

**Section A. Methods**

**Section B. Materials and synthetic procedures**

**Section C. Elemental analysis**

**Section D. NMR spectra**

**Section E. FT IR spectral profiles**

**Section F. TGA profiles**

**Section G. PXRD patterns**

**Section H. Cycling performance**

**Section I. Nitrogen adsorption isotherms**

**Section J. Atomistic coordinates**

**Section K. Supporting references**

## Section A. Methods

Fourier transforms Infrared (FT IR) spectra were recorded on a JASCO model FT IR-6100 infrared spectrometer. Powder X-ray diffraction (PXRD) data were recorded on a Rigaku model RINT Ultima III diffractometer by depositing powder on glass substrate, from  $2\theta = 1.5^\circ$  up to  $60^\circ$  with  $0.02^\circ$  increment. TGA measurements were performed on a Mettler-Toledo model TGA/SDTA851e under  $N_2$ , by heating to  $800^\circ C$  at a rate of  $10^\circ C \text{ min}^{-1}$ . Nitrogen sorption isotherms were measured at  $77 \text{ K}$  with a Bel Japan Inc. model BELSORP-mini II analyzer. Before measurement, the samples were degassed in vacuum at  $120^\circ C$  for more than 10 h. By using the non-local density functional theory (NLDFT) model, the pore volume was derived from the sorption curve.

The isosteric heat of adsorption,  $Q_{st}$ , defined as  $Q_{st} = RT^2 \left( \frac{\partial \ln p}{\partial T} \right)_q$ , was determined using the pure component isotherm fits using the Clausius-Clapeyron equation.  $R$  is the gas constant,  $8.314 \text{ J mol}^{-1} \text{ K}^{-1}$ .

The crystalline structures were determined using the density-functional tight-binding (DFTB+) method including Lennard-Jones (LJ) dispersion. The calculations were carried out with the DFTB+ program package version 1.2.<sup>S1</sup> DFTB is an approximate density functional theory method based on the tight binding approach and utilizes an optimized minimal LCAO Slater-type all-valence basis set in combination with a two-center approximation for Hamiltonian matrix elements. The Coulombic interaction between partial atomic charges was determined using the self-consistent charge (SCC) formalism. Lennard-Jones type dispersion was employed in all calculations to describe van der Waals (vdW) and  $\pi$ -stacking interactions. The lattice dimensions were optimized simultaneously with the geometry. Standard DFTB parameters for X–Y element pair (X, Y = C, S, H and N) interactions were employed from the mio-0-1 set.<sup>S2</sup>

Molecular modeling and Pawley refinement were carried out using Reflex, a software package for crystal determination from XRD pattern, implemented in MS modeling version 4.4 (Accelrys Inc.).<sup>S3</sup> Initially, unit cell dimensions for hexagonal lattices were taken from the DFTB calculation and the space group for hexagonal crystal system were selected as *P3*, respectively. We performed Pawley refinement for hexagonal lattice to optimize the lattice parameters iteratively until the  $R_{WP}$  value converges. The pseudo-Voigt profile function was used for whole profile fitting and Berrar-Baldinozzi function was used for asymmetry correction during the refinement processes. The final  $R_{wp}$  and  $R_p$  values were  $R_{WP} = 9.56\%$  and  $R_p = 6.56\%$  for TFPB-TAPB-COF,  $R_{WP} = 21.7\%$  and  $R_p = 15.08\%$  for TFPA-TAPB-COF,  $R_{WP} = 15.60\%$ ;  $R_p = 12.77\%$  for BTMA-TAPA-COF and  $R_{WP} = 9.90\%$ ;  $R_p = 7.65\%$  for TFPA-TAPA-COF, respectively. The high  $R_{wp}$  and  $R_p$  values of TFPA-TAPB-COF are associated with the unclear shoulder peak at around  $6^\circ$ .

## Section B. Materials and synthetic procedures

Mesitylene, 1,4-dioxane and tetrahydrofuran (THF) were purchased from Wako chemicals. Tris(4-aminophenyl)amine(TAPA), 1,3,5-tris(4-aminophenyl)benzene (TAPB), tris(4-formylphenyl)amine(TFPA) and acetic acid were purchased from TCI. 1,3,5-Tris(4-formylphenyl)benzene (TFPB) was synthesized according to a reported method.<sup>S4</sup> tris(bromoduryl)borane was synthesized according to a reported method.<sup>S5</sup>

**Synthesis of 4,4',4''-boranetriyltris(2,3,5,6-tetramethylbenzaldehyde) (BTMA).** To an anhydrous THF solution (40 mL) of tris(bromoduryl)borane (1 g, 1.6 mmol) was added dropwise with a pentane solution of t-BuLi (1.5 M, 5 mL, 7.5mmol) at  $-78\text{ }^{\circ}\text{C}$ . The mixture was stirred for 2 h and anhydrous DMF (5 mL) was added at  $-78\text{ }^{\circ}\text{C}$ . The mixture was warmed up to room temperature over 1 h and stirred overnight. The mixture was charged with concentrated HCl and stirred for 1 h. After addition of water (100 mL), the mixture was extracted with  $\text{CH}_2\text{Cl}_2$  (100 mL x 3). The extract was combined and washed with brine and water, dried over anhydrous  $\text{MgSO}_4$ , and concentrated under reduced pressure. The crude product was purified by column chromatography using a mixture of  $\text{CH}_2\text{Cl}_2$  and hexane (1:1 to 3:1) as eluent to obtain the product 4,4',4''-boranetriyltris(2,3,5,6-tetramethylbenzaldehyde) as a white soild (220 mg, 27% yield).  $^1\text{H}$ NMR ( $\text{CDCl}_3$ ): 10.64 (s, 3H), 2.28 (s, 18H) and 1.97 (s, 18H).

**TFPB-TAPB-COF.** A mesitylene/1,4-dioxane (0.9 mL/0.1 mL) mixture of TFPB (0.048 mmol, 18.9 mg) and TAPB (0.048 mmol, 17 mg) in the presence of acetic acid (6 M, 0.1mL) in a Pyrex tube (10mL) was degassed by three freeze-pump-thaw cycles. The tube was sealed off by flame sand heated at  $120\text{ }^{\circ}\text{C}$  for 3 days. The precipitate was collected via centrifuge, washed with THF for 6 times. The powder was dried at  $120\text{ }^{\circ}\text{C}$  under vacuum overnight to give the corresponding TFPB-TAPB-COF in 87% isolated yield.

**TFPA-TAPB-COF.** A mesitylene/1,4-dioxane (0.5 mL/0.5 mL) mixture of TFPA (0.048 mmol, 15.94 mg) and TAPB (0.048 mmol, 17 mg) in the presence of acetic acid (6 M, 0.1 mL) in a

Pyrex tube (10 mL) was degassed by three freeze-pump-thaw cycles. The tube was sealed off by flame and heated at 120 °C for 3 days. The precipitate was collected via centrifuge, washed with THF for 6 times. The powder was dried at 120 °C under vacuum overnight to give the corresponding TFPA-TAPB-COF in 84% isolated yield.

**BTMA-TAPA-COF.** An *o*-DCB/*n*-BuOH (0.5 mL/0.5 mL) mixture of TAPA (17.8 mg, 0.0617 mmol) and BTMA (30.37 mg, 0.0617 mmol) in the presence of acetic acid (6 M, 0.1 mL) in a Pyrex tube (10 mL) was degassed by three freeze-pump-thaw cycles. The tube was sealed off by flame and heated at 120 °C for 3 days. The precipitate was collected via centrifuge, washed with THF for 6 times. The powder was dried at 120 °C under vacuum overnight to give the corresponding BTMA-TAPA-COF in 78% isolated yield.

**TFPA-TAPA-COF.** A mesitylene/1,4-dioxane (0.5 mL/0.5 mL) mixture of TAPA (0.049 mmol, 14.1 mg) and TFPA (0.048 mmol, 15.94 mg) in the presence of acetic acid (6 M, 0.1 mL) in a Pyrex tube (10 mL) was degassed by three freeze-pump-thaw cycles. The tube was sealed off by flame and heated at 120 °C for 3 days. The precipitate was collected via centrifuge, washed with THF for 6 times. The powder was dried at 120 °C under vacuum overnight to give the corresponding TFPA-TAPA-COF in 85% isolated yield.

### Section C. Elemental analysis

**Table S1.** Elemental analysis results of TFPB-TAPB-COF, TFPA-TAPB-COF, BTMA-TAPA-COF and TFPA-TAPA-COF

| COFs                 |        | C%    | H%   | N%    |
|----------------------|--------|-------|------|-------|
| <b>TFPB-TAPB-COF</b> | Calcd. | 88.44 | 5.35 | 6.07  |
|                      | Found  | 86.16 | 5.22 | 5.39  |
| <b>TFPA-TAPB-COF</b> | Calcd. | 85.71 | 5.39 | 7.61  |
|                      | Found  | 83.69 | 4.85 | 8.41  |
| <b>BTMA-TAPA-COF</b> | Calcd. | 83.84 | 6.99 | 7.67  |
|                      | Found  | 81.57 | 5.68 | 7.34  |
| <b>TFPA-TAPA-COF</b> | Calcd. | 82.25 | 5.44 | 12.28 |
|                      | Found  | 79.22 | 3.89 | 11.44 |

## Section D. NMR spectra

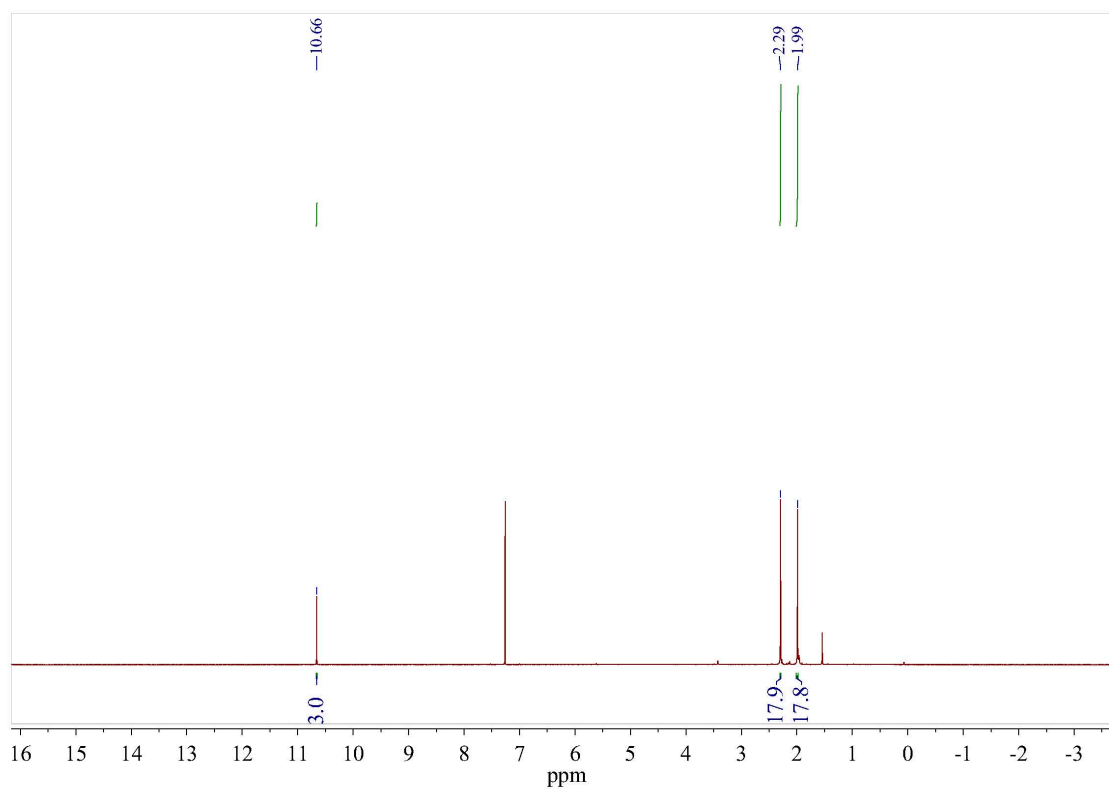

**Figure S1.** <sup>1</sup>H NMR of 4,4',4''-boranetriyltris(2,3,5,6-tetramethylbenzaldehyde, BTMA) (CDCl<sub>3</sub>)

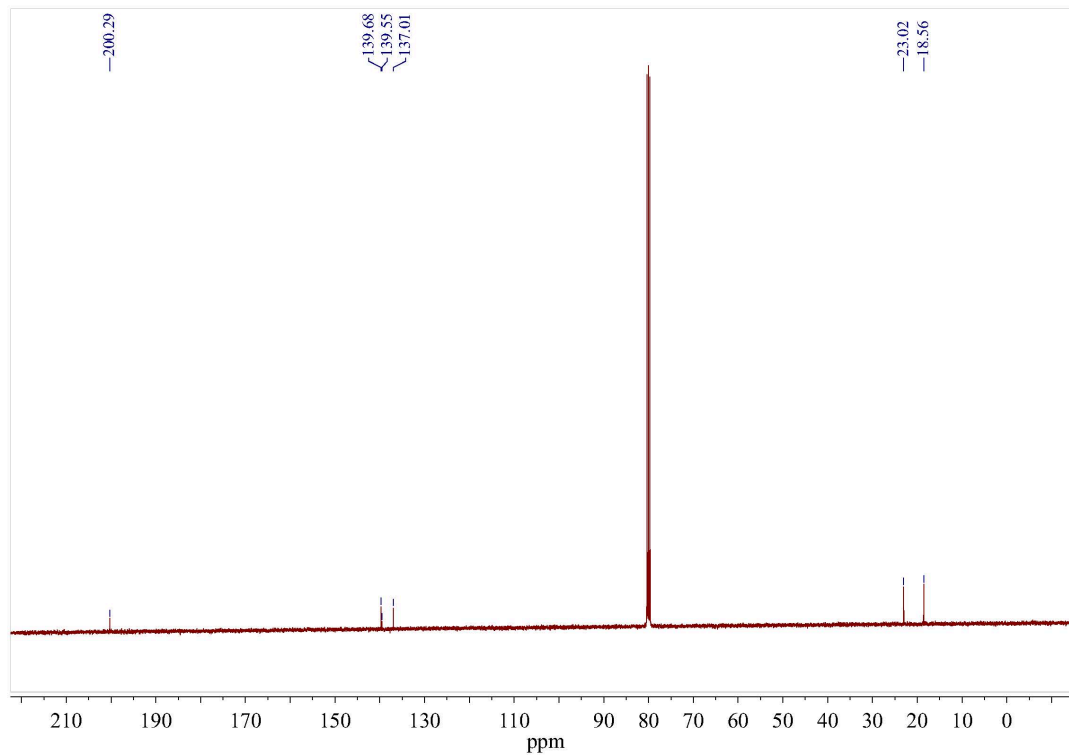

**Figure S2.** <sup>13</sup>C NMR of 4,4',4''-boranetriyltris(2,3,5,6-tetramethylbenzaldehyde, BTMA) (CDCl<sub>3</sub>)

Section E. IR spectroscopy

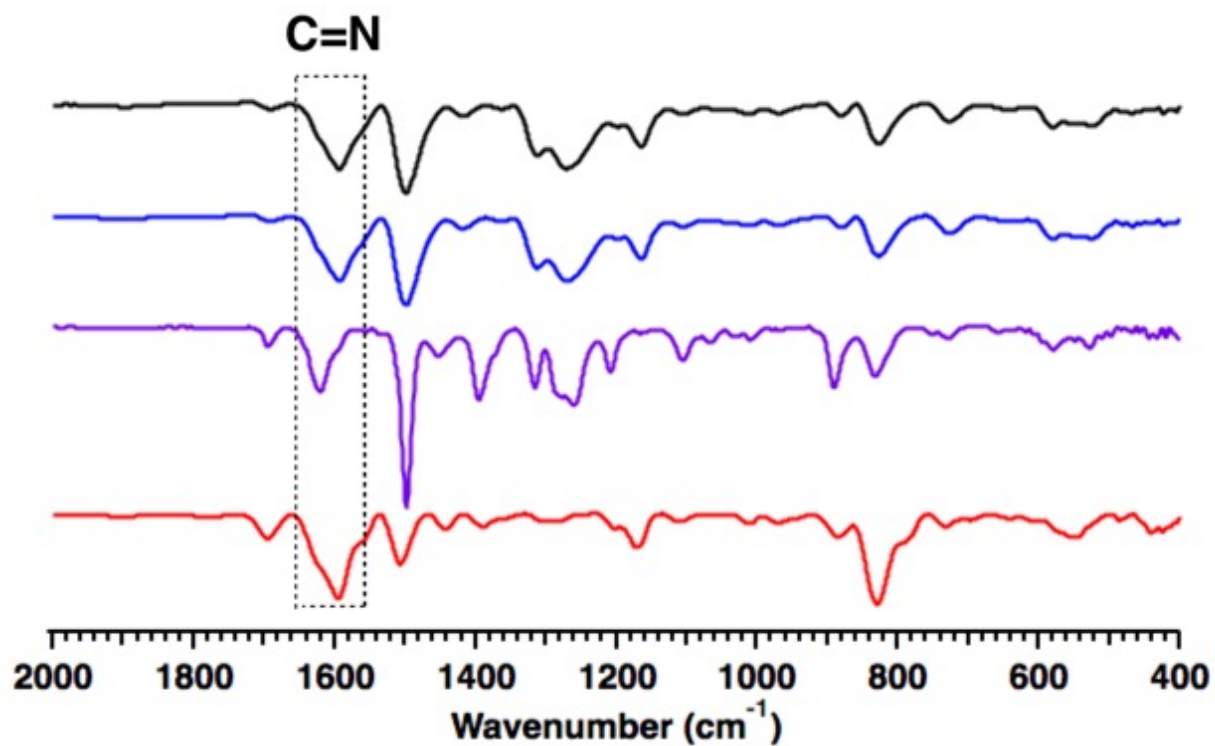

**Figure S3.** FT-IR spectra of TFPB-TAPB-COF (black), TFPA-TAPB-COF (blue), BTMA-TAPA-COF (purple) and TFPA-TAPA-COF (red).



## Section F. Thermal gravimetric analysis

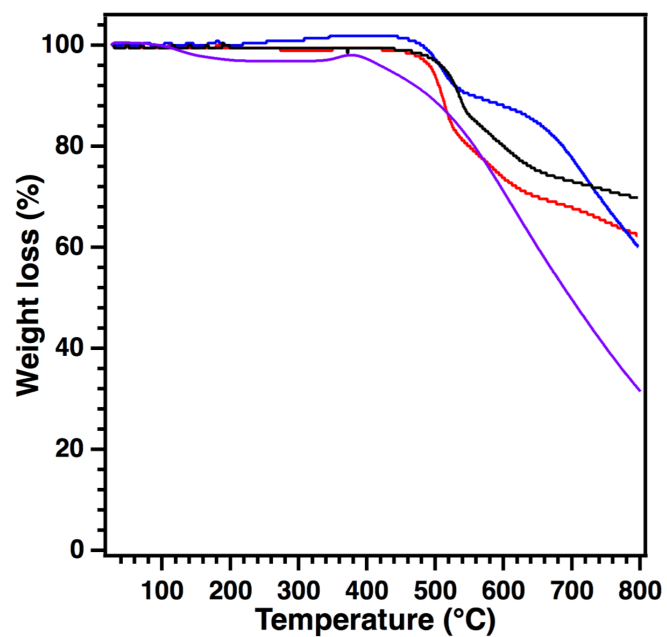

**Figure S4.** TGA curve of TFPB-TAPB-COF (black curves), TFPA-TAPB-COF (blue curves), BTMA-TAPA-COF (purple curves) and TFPA-TAPA-COF (red curves).

## Section G. PXRD patterns

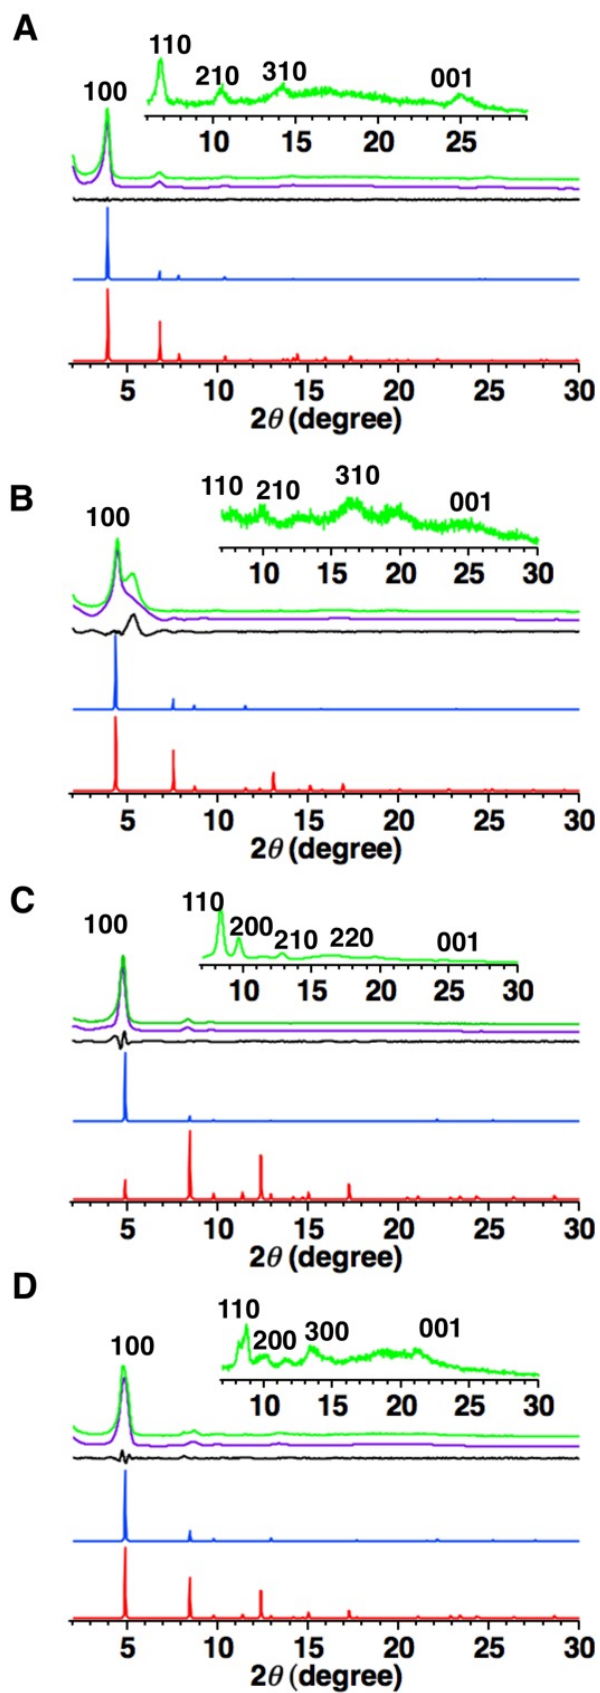

**Figure S5.** PXRD assignments of (A) TFPB-TAPB-COF, (B) TFPA-TAPB-COF, (C) BTMA-TAPA-COF and (D) TFPA-TAPA-COF. The originality of the shoulder peak around  $6^\circ$  in (B) is unclear.

## Section H. Nitrogen adsorption isotherm

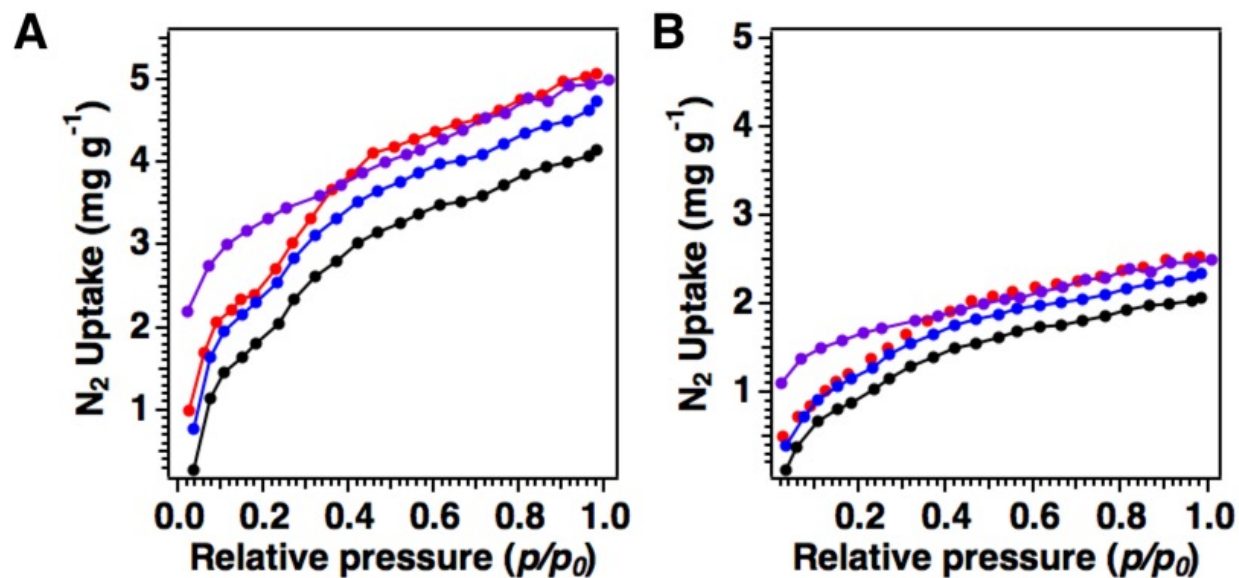

**Figure S6.** Nitrogen adsorption isotherm curves of TFPB-TAPB-COF (black curve), TFPA-TAPB-COF (blue curve), BTMA-TAPA-COF (purple curve) and TFPA-TAPA-COF (red curve) at (A) 273 K and (B) 298 K.

## Section I. Cycling performance of CO<sub>2</sub> capture capacity

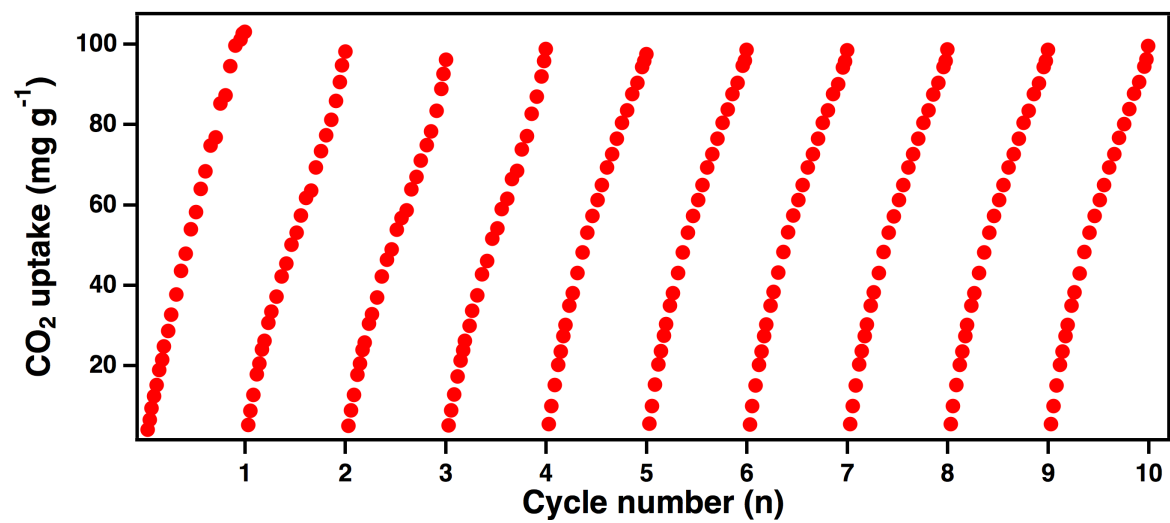

Figure S7. CO<sub>2</sub> uptake cycling performance of TFPA-TAPA-COF at 273 K.

## Section J. Atomistic coordinates

**Table S2.** Atomistic coordinates for the AA-stacking mode of TFPB-TAPB-COF optimized by using DFTB+ method. Space group:  $P3$ ;  $a = 26.0324 \text{ \AA}$ ,  $b = 26.0324 \text{ \AA}$ , and  $c = 3.6329 \text{ \AA}$ .

| Atom | $x/a$   | $y/b$   | $z/c$   |
|------|---------|---------|---------|
| C    | 2.26456 | 2.82035 | 0.34858 |
| C    | 2.29494 | 2.78951 | 0.33548 |
| C    | 2.26886 | 2.73077 | 0.46047 |
| C    | 2.21047 | 2.70421 | 0.59277 |
| C    | 2.1795  | 2.73449 | 0.60274 |
| C    | 2.20648 | 2.79378 | 0.48562 |
| C    | 2.30197 | 2.69774 | 0.45481 |
| C    | 2.27181 | 2.63577 | 0.45448 |
| N    | 2.64962 | 2.82033 | 0.48383 |
| C    | 3.09128 | 3.226   | 0.50235 |
| C    | 3.05551 | 3.16506 | 0.49663 |
| C    | 3.07555 | 3.12784 | 0.63497 |
| C    | 3.13327 | 3.15455 | 0.77787 |
| C    | 3.1692  | 3.21552 | 0.78291 |
| C    | 3.14892 | 3.25249 | 0.64562 |
| C    | 3.03669 | 3.06206 | 0.63223 |
| C    | 2.97498 | 3.03618 | 0.63205 |
| C    | 3.13016 | 2.813   | 0.65488 |
| H    | 2.28576 | 2.86612 | 0.24944 |
| H    | 2.33962 | 2.81162 | 0.21776 |
| H    | 2.18848 | 2.65877 | 0.69867 |
| H    | 2.13401 | 2.7114  | 0.70749 |
| H    | 2.22332 | 2.61138 | 0.45511 |
| H    | 3.07485 | 3.25417 | 0.39098 |
| H    | 3.01136 | 3.14621 | 0.37365 |
| H    | 3.15039 | 3.12749 | 0.89736 |
| H    | 3.21387 | 3.23499 | 0.89987 |
| H    | 2.95527 | 3.0647  | 0.63236 |
| H    | 3.10563 | 2.77081 | 0.81586 |

**Table S3.** Atomistic coordinates for the refined unit cell parameters for TFPB-TAPB-COF via Pawley refinement. Space group:  $P3$ ;  $a = 26.0077 \text{ \AA}$ ,  $b = 26.0077 \text{ \AA}$ , and  $c = 3.6347 \text{ \AA}$ .

| Atom | $x/a$   | $y/b$   | $z/c$   |
|------|---------|---------|---------|
| C    | 2.26456 | 2.82035 | 0.34858 |
| C    | 2.29494 | 2.78951 | 0.33548 |
| C    | 2.26886 | 2.73077 | 0.46047 |
| C    | 2.21047 | 2.70421 | 0.59277 |
| C    | 2.1795  | 2.73449 | 0.60274 |
| C    | 2.20648 | 2.79378 | 0.48562 |
| C    | 2.30197 | 2.69774 | 0.45481 |
| C    | 2.27181 | 2.63577 | 0.45448 |
| N    | 2.64962 | 2.82033 | 0.48383 |
| C    | 3.09128 | 3.226   | 0.50235 |
| C    | 3.05551 | 3.16506 | 0.49663 |
| C    | 3.07555 | 3.12784 | 0.63497 |
| C    | 3.13327 | 3.15455 | 0.77787 |
| C    | 3.1692  | 3.21552 | 0.78291 |
| C    | 3.14892 | 3.25249 | 0.64562 |
| C    | 3.03669 | 3.06206 | 0.63223 |
| C    | 2.97498 | 3.03618 | 0.63205 |
| C    | 3.13016 | 2.813   | 0.65488 |
| H    | 2.28576 | 2.86612 | 0.24944 |
| H    | 2.33962 | 2.81162 | 0.21776 |
| H    | 2.18848 | 2.65877 | 0.69867 |
| H    | 2.13401 | 2.7114  | 0.70749 |
| H    | 2.22332 | 2.61138 | 0.45511 |
| H    | 3.07485 | 3.25417 | 0.39098 |
| H    | 3.01136 | 3.14621 | 0.37365 |
| H    | 3.15039 | 3.12749 | 0.89736 |
| H    | 3.21387 | 3.23499 | 0.89987 |
| H    | 2.95527 | 3.0647  | 0.63236 |
| H    | 3.10563 | 2.77081 | 0.81586 |

**Table S4.** Atomistic coordinates for the AB-stacking mode of TFPB-TAPB-COF optimized by using DFTB+ method. Space group:  $P3$ ;  $a = 25.9516 \text{ \AA}$ ,  $b = 25.9516 \text{ \AA}$ , and  $c = 6.3891 \text{ \AA}$ .

| Atom | $x/a$   | $y/b$   | $z/c$    |
|------|---------|---------|----------|
| C    | 0.25086 | 0.80492 | 0.00839  |
| C    | 0.27908 | 0.77163 | 0.00833  |
| C    | 0.27543 | 0.73747 | 0.18289  |
| C    | 0.24367 | 0.73792 | 0.35881  |
| C    | 0.21532 | 0.77111 | 0.36023  |
| C    | 0.21777 | 0.80408 | 0.18286  |
| C    | 0.30549 | 0.70086 | 0.18225  |
| C    | 0.27147 | 0.6389  | 0.18223  |
| N    | 0.64887 | 0.80895 | 0.17686  |
| C    | 0.0863  | 0.22537 | 0.16224  |
| C    | 0.05162 | 0.16411 | 0.16178  |
| C    | 0.07225 | 0.12843 | 0.25135  |
| C    | 0.12902 | 0.15674 | 0.34209  |
| C    | 0.16374 | 0.21802 | 0.34322  |
| C    | 0.14304 | 0.25346 | 0.25309  |
| C    | 0.03504 | 0.06232 | 0.25004  |
| C    | 0.97303 | 0.03465 | 0.24989  |
| C    | 0.13826 | 0.81976 | 0.25354  |
| H    | 0.25316 | 0.83096 | -0.12953 |
| H    | 0.30417 | 0.77185 | -0.1297  |
| H    | 0.24155 | 0.71221 | 0.49766  |
| H    | 0.19195 | 0.77205 | 0.50154  |
| H    | 0.22287 | 0.61707 | 0.18243  |
| H    | 0.06953 | 0.2524  | 0.09028  |
| H    | 0.00778 | 0.14384 | 0.08798  |
| H    | 0.14673 | 0.13069 | 0.41458  |
| H    | 0.2078  | 0.23882 | 0.41636  |
| H    | 0.9518  | 0.06194 | 0.24985  |
| H    | 0.11133 | 0.77373 | 0.31929  |
| C    | 0.93793 | 0.15908 | 0.66745  |

|   |         |         |         |
|---|---------|---------|---------|
| C | 0.96657 | 0.12625 | 0.66449 |
| C | 0.94017 | 0.06903 | 0.75186 |
| C | 0.88361 | 0.04607 | 0.84178 |
| C | 0.85504 | 0.07894 | 0.84912 |
| C | 0.88234 | 0.13641 | 0.76421 |
| C | 0.97097 | 0.03348 | 0.74929 |
| C | 0.93828 | 0.97133 | 0.74917 |
| N | 0.3168  | 0.14609 | 0.75869 |
| C | 0.75994 | 0.55639 | 0.74102 |
| C | 0.72885 | 0.49483 | 0.73766 |
| C | 0.73092 | 0.4624  | 0.90908 |
| C | 0.76429 | 0.49299 | 1.08485 |
| C | 0.79454 | 0.55457 | 1.08966 |
| C | 0.79318 | 0.58727 | 0.91736 |
| C | 0.69763 | 0.39553 | 0.90578 |
| C | 0.63554 | 0.36419 | 0.90569 |
| C | 0.82625 | 0.17355 | 0.9229  |
| H | 0.95941 | 0.2036  | 0.59851 |
| H | 0.01023 | 0.14565 | 0.58963 |
| H | 0.861   | 1.00142 | 0.90945 |
| H | 0.81066 | 0.05918 | 0.91886 |
| H | 0.88967 | 0.9487  | 0.74906 |
| H | 0.75843 | 0.5814  | 0.6054  |
| H | 0.70291 | 0.47139 | 0.59899 |
| H | 0.76606 | 0.46818 | 1.22054 |
| H | 0.82004 | 0.57779 | 1.22953 |
| H | 0.61109 | 0.38843 | 0.90638 |
| H | 0.82575 | 0.15175 | 1.07491 |



**Table S5.** Atomistic coordinates for the AA-stacking mode of TFPA-TAPB-COF optimized by using DFTB+ method. Space group:  $P3$ ;  $a = 23.4586 \text{ \AA}$ ,  $b = 23.4586 \text{ \AA}$ , and  $c = 3.8991 \text{ \AA}$ .

| Atom | $x/a$    | $y/b$    | $z/c$   |
|------|----------|----------|---------|
| C    | -0.13052 | -0.17467 | 0.30775 |
| C    | -0.09667 | -0.10678 | 0.29438 |
| C    | -0.03459 | -0.07013 | 0.44937 |
| C    | -0.00766 | -0.10487 | 0.61074 |
| C    | -0.04109 | -0.1728  | 0.62013 |
| C    | -0.10396 | -0.20927 | 0.47314 |
| N    | -0.13546 | 0.14292  | 0.46933 |
| C    | 0.4164   | 0.18581  | 0.47434 |
| C    | 0.48406  | 0.21405  | 0.46698 |
| C    | 0.52486  | 0.27475  | 0.62632 |
| C    | 0.49507  | 0.30611  | 0.79253 |
| C    | 0.42736  | 0.27787  | 0.80043 |
| C    | 0.38671  | 0.21718  | 0.64162 |
| C    | 0.59786  | 0.30492  | 0.62192 |
| C    | 0.62673  | 0.26531  | 0.62164 |
| C    | -0.12771 | -0.31495 | 0.65322 |
| H    | -0.17873 | -0.20216 | 0.18476 |
| H    | -0.11887 | -0.08211 | 0.15764 |
| H    | 0.04026  | -0.07848 | 0.73652 |
| H    | -0.01765 | -0.19706 | 0.74994 |
| H    | 0.38538  | 0.13867  | 0.34601 |
| H    | 0.50552  | 0.18889  | 0.32669 |
| H    | 0.52507  | -0.6473  | 0.92758 |
| H    | 0.40542  | 0.30309  | 0.93632 |
| H    | 0.59526  | 0.21173  | 0.62215 |
| H    | -0.08388 | -0.29507 | 0.82666 |
| N    | 0        | 0        | 0.44289 |

**Table S6.** Atomistic coordinates for the refined unit cell parameters for TFPA-TAPB-COF via Pawley refinement. Space group:  $P3$ ;  $a = 23.4694 \text{ \AA}$ ,  $b = 23.4694 \text{ \AA}$ , and  $c = 3.8935 \text{ \AA}$ .

| Atom | $x/a$    | $y/b$    | $z/c$   |
|------|----------|----------|---------|
| C    | -0.13052 | -0.17467 | 0.30775 |
| C    | -0.09667 | -0.10678 | 0.29438 |
| C    | -0.03459 | -0.07013 | 0.44937 |
| C    | -0.00766 | -0.10487 | 0.61074 |
| C    | -0.04109 | -0.1728  | 0.62013 |
| C    | -0.10396 | -0.20927 | 0.47314 |
| N    | -0.13546 | 0.14292  | 0.46933 |
| C    | 0.4164   | 0.18581  | 0.47434 |
| C    | 0.48406  | 0.21405  | 0.46698 |
| C    | 0.52486  | 0.27475  | 0.62632 |
| C    | 0.49507  | 0.30611  | 0.79253 |
| C    | 0.42736  | 0.27787  | 0.80043 |
| C    | 0.38671  | 0.21718  | 0.64162 |
| C    | 0.59786  | 0.30492  | 0.62192 |
| C    | 0.62673  | 0.26531  | 0.62164 |
| C    | -0.12771 | -0.31495 | 0.65322 |
| H    | -0.17873 | -0.20216 | 0.18476 |
| H    | -0.11887 | -0.08211 | 0.15764 |
| H    | 0.04026  | -0.07848 | 0.73652 |
| H    | -0.01765 | -0.19706 | 0.74994 |
| H    | 0.38538  | 0.13867  | 0.34601 |
| H    | 0.50552  | 0.18889  | 0.32669 |
| H    | 0.52507  | -0.6473  | 0.92758 |
| H    | 0.40542  | 0.30309  | 0.93632 |
| H    | 0.59526  | 0.21173  | 0.62215 |
| H    | -0.08388 | -0.29507 | 0.82666 |
| N    | 0        | 0        | 0.44289 |

**Table S7.** Atomistic coordinates for the AB-stacking mode of TFPA-TAPB-COF optimized by using DFTB+ method. Space group:  $P3$ ;  $a = 23.394 \text{ \AA}$ ,  $b = 23.394 \text{ \AA}$ , and  $c = 7.179 \text{ \AA}$ .

| Atom | $x/a$   | $y/b$   | $z/c$   |
|------|---------|---------|---------|
| C    | 0.54067 | 0.16046 | 0.10875 |
| C    | 0.57483 | 0.22862 | 0.10776 |
| C    | 0.63133 | 0.26324 | 0.21893 |
| C    | 0.65238 | 0.22814 | 0.33119 |
| C    | 0.61823 | 0.15995 | 0.33095 |
| C    | 0.56218 | 0.12498 | 0.21769 |
| N    | 0.53272 | 0.47695 | 0.21129 |
| C    | 0.08174 | 0.52269 | 0.17064 |
| C    | 0.14933 | 0.54936 | 0.16493 |
| C    | 0.19162 | 0.61112 | 0.24511 |
| C    | 0.16355 | 0.64519 | 0.33034 |
| C    | 0.09587 | 0.61869 | 0.33495 |
| C    | 0.05374 | 0.55684 | 0.25582 |
| C    | 0.26462 | 0.63977 | 0.2398  |
| C    | 0.29197 | 0.59866 | 0.23897 |
| C    | 0.54629 | 0.0181  | 0.2615  |
| H    | 0.497   | 0.13347 | 0.02078 |
| H    | 0.55793 | 0.25551 | 0.02015 |
| H    | 0.69561 | 0.25483 | 0.42099 |
| H    | 0.63477 | 0.13398 | 0.42365 |
| H    | 0.04941 | 0.4745  | 0.10711 |
| H    | 0.16944 | 0.52185 | 0.09382 |
| H    | 0.19482 | 0.6929  | 0.39734 |
| H    | 0.07528 | 0.64622 | 0.40361 |
| H    | 0.25943 | 0.5451  | 0.23901 |
| H    | 0.59838 | 0.03717 | 0.3088  |
| C    | 0.19913 | 0.49214 | 0.66251 |
| C    | 0.23412 | 0.56022 | 0.65325 |
| C    | 0.29725 | 0.59637 | 0.73307 |
| C    | 0.32389 | 0.561   | 0.81895 |

|   |         |         |         |
|---|---------|---------|---------|
| C | 0.28878 | 0.49293 | 0.83004 |
| C | 0.22506 | 0.45725 | 0.75464 |
| N | 0.201   | 0.81323 | 0.75503 |
| C | 0.75193 | 0.85768 | 0.74858 |
| C | 0.82009 | 0.8887  | 0.74823 |
| C | 0.85707 | 0.93482 | 0.88613 |
| C | 0.82385 | 0.94868 | 1.02511 |
| C | 0.75558 | 0.91679 | 1.02731 |
| C | 0.71843 | 0.87095 | 0.88869 |
| C | 0.93098 | 0.96856 | 0.88545 |
| C | 0.96263 | 0.93136 | 0.88543 |
| C | 0.19147 | 0.35402 | 0.89129 |
| H | 0.15003 | 0.46517 | 0.59978 |
| H | 0.21185 | 0.58528 | 0.58076 |
| H | 0.37299 | 0.58701 | 0.88114 |
| H | 0.31211 | 0.46776 | 0.89695 |
| H | 0.72353 | 0.82204 | 0.63924 |
| H | 0.84526 | 0.87754 | 0.63765 |
| H | 0.85185 | 0.98425 | 1.13494 |
| H | 0.73051 | 0.92783 | 1.13864 |
| H | 0.93325 | 0.87739 | 0.88555 |
| H | 0.22375 | 0.37739 | 1.01594 |
| N | 0.66667 | 0.33333 | 0.2194  |
| N | 0.33333 | 0.66667 | 0.72637 |

**Table S8.** Atomistic coordinates for the AA-stacking mode of TFPA-TAPA-COF optimized by using DFTB+ method. Space group:  $P3$ ;  $a = 20.8677 \text{ \AA}$ ,  $b = 20.8677 \text{ \AA}$ , and  $c = 4.1175 \text{ \AA}$ .

| Atom | $x/a$    | $y/b$   | $z/c$   |
|------|----------|---------|---------|
| C    | -0.04977 | 1.14634 | 0.29258 |
| C    | -0.01204 | 1.10778 | 0.27472 |
| C    | -0.03955 | 1.0392  | 0.43122 |
| C    | -0.10701 | 1.01025 | 0.59848 |
| C    | -0.14504 | 1.04857 | 0.61396 |
| C    | -0.11634 | 1.11823 | 0.46594 |
| N    | 0.31234  | 1.1499  | 0.46794 |
| C    | -0.26369 | 0.53303 | 0.49259 |
| C    | -0.30847 | 0.45708 | 0.48958 |
| C    | -0.28721 | 0.41168 | 0.65389 |
| C    | -0.21956 | 0.44534 | 0.82123 |
| C    | -0.17534 | 0.52143 | 0.82573 |
| C    | -0.19628 | 0.56684 | 0.66105 |
| C    | -0.20338 | 1.14907 | 0.66684 |
| H    | -0.02763 | 1.19966 | 0.16914 |
| H    | 0.03936  | 1.1312  | 0.13557 |
| H    | -0.1301  | 0.95696 | 0.72237 |
| H    | -0.19731 | 1.02359 | 0.74764 |
| H    | -0.2807  | 0.56749 | 0.35972 |
| H    | 0.63949  | 0.43264 | 0.35498 |
| H    | -0.20155 | 0.41176 | 0.95348 |
| H    | -0.12341 | 0.54625 | 0.96267 |
| H    | -0.2262  | 1.10306 | 0.84866 |
| N    | 0        | 1       | 0.42    |
| N    | -0.33333 | 0.33333 | 0.65134 |

**Table S9.** Atomistic coordinates for the refined unit cell parameters for TFPA-TAPA-COF via Pawley refinement. Space group:  $P3$ ;  $a = 20.0691 \text{ \AA}$ ,  $b = 20.0691 \text{ \AA}$ , and  $c = 4.1936 \text{ \AA}$ .

| Atom | $x/a$    | $y/b$   | $z/c$   |
|------|----------|---------|---------|
| C    | -0.04977 | 1.14634 | 0.29258 |
| C    | -0.01204 | 1.10778 | 0.27472 |
| C    | -0.03955 | 1.0392  | 0.43122 |
| C    | -0.10701 | 1.01025 | 0.59848 |
| C    | -0.14504 | 1.04857 | 0.61396 |
| C    | -0.11634 | 1.11823 | 0.46594 |
| N    | 0.31234  | 1.1499  | 0.46794 |
| C    | -0.26369 | 0.53303 | 0.49259 |
| C    | -0.30847 | 0.45708 | 0.48958 |
| C    | -0.28721 | 0.41168 | 0.65389 |
| C    | -0.21956 | 0.44534 | 0.82123 |
| C    | -0.17534 | 0.52143 | 0.82573 |
| C    | -0.19628 | 0.56684 | 0.66105 |
| C    | -0.20338 | 1.14907 | 0.66684 |
| H    | -0.02763 | 1.19966 | 0.16914 |
| H    | 0.03936  | 1.1312  | 0.13557 |
| H    | -0.1301  | 0.95696 | 0.72237 |
| H    | -0.19731 | 1.02359 | 0.74764 |
| H    | -0.2807  | 0.56749 | 0.35972 |
| H    | 0.63949  | 0.43264 | 0.35498 |
| H    | -0.20155 | 0.41176 | 0.95348 |
| H    | -0.12341 | 0.54625 | 0.96267 |
| H    | -0.2262  | 1.10306 | 0.84866 |
| N    | 0        | 1       | 0.42    |
| N    | -0.33333 | 0.33333 | 0.65134 |

**Table S10.** Atomistic coordinates for the AB-stacking mode of TFPA-TAPA-COF optimized by using DFTB+ method. Space group:  $P3$ ;  $a = 20.8778 \text{ \AA}$ ,  $b = 20.8778 \text{ \AA}$ , and  $c = 7.7734 \text{ \AA}$ .

| Atom | $x/a$   | $y/b$   | $z/c$   |
|------|---------|---------|---------|
| C    | 0.28632 | 0.81315 | 0.10156 |
| C    | 0.32206 | 0.7726  | 0.09417 |
| C    | 0.29656 | 0.70843 | 0.19413 |
| C    | 0.23491 | 0.68617 | 0.30129 |
| C    | 0.19915 | 0.72675 | 0.30769 |
| C    | 0.22382 | 0.79054 | 0.20617 |
| N    | 0.64421 | 0.80766 | 0.20705 |
| C    | 0.06927 | 0.19989 | 0.18339 |
| C    | 0.02397 | 0.12403 | 0.18154 |
| C    | 0.04628 | 0.07815 | 0.26255 |
| C    | 0.11559 | 0.11113 | 0.34381 |
| C    | 0.16134 | 0.18693 | 0.34145 |
| C    | 0.13909 | 0.23286 | 0.2619  |
| C    | 0.12508 | 0.81191 | 0.25967 |
| H    | 0.30591 | 0.86286 | 0.02263 |
| H    | 0.37028 | 0.79061 | 0.01074 |
| H    | 0.2155  | 0.637   | 0.38213 |
| H    | 0.15255 | 0.70907 | 0.39616 |
| H    | 0.05116 | 0.23479 | 0.11929 |
| H    | 0.97101 | 0.10026 | 0.11429 |
| H    | 0.13403 | 0.07729 | 0.41101 |
| H    | 0.21508 | 0.21103 | 0.40599 |
| H    | 0.08778 | 0.75361 | 0.30352 |
| C    | 0.95794 | 0.15206 | 0.69045 |
| C    | 0.99387 | 0.11167 | 0.68189 |
| C    | 0.96317 | 0.04183 | 0.76054 |
| C    | 0.89466 | 0.01377 | 0.84379 |
| C    | 0.85829 | 0.05372 | 0.85013 |
| C    | 0.88999 | 0.12442 | 0.77603 |
| N    | 0.31218 | 0.14336 | 0.7733  |

|   |         |         |         |
|---|---------|---------|---------|
| C | 0.73367 | 0.53147 | 0.77199 |
| C | 0.69095 | 0.45529 | 0.76737 |
| C | 0.71057 | 0.41179 | 0.86761 |
| C | 0.77374 | 0.44636 | 0.97216 |
| C | 0.81563 | 0.52265 | 0.97701 |
| C | 0.79664 | 0.56661 | 0.87705 |
| C | 0.80562 | 0.15813 | 0.88361 |
| H | 0.98285 | 0.20646 | 0.6293  |
| H | 0.04611 | 0.13469 | 0.61173 |
| H | 0.86913 | 0.95971 | 0.90629 |
| H | 0.8045  | 0.0287  | 0.91425 |
| H | 0.71842 | 0.56511 | 0.6927  |
| H | 0.64198 | 0.42889 | 0.68484 |
| H | 0.78949 | 0.41318 | 1.05151 |
| H | 0.86439 | 0.54889 | 1.0605  |
| H | 0.78637 | 0.11535 | 0.98778 |
| N | 0.33333 | 0.66667 | 0.18782 |
| N | 0       | 0       | 0.26174 |
| N | 0       | 0       | 0.75461 |
| N | 0.66667 | 0.33333 | 0.86317 |



**Table S11.** Atomistic coordinates for the AA-stacking mode of BTMA-TAPA-COF optimized by using DFTB+ method. Space group:  $P3$ ;  $a = 20.7444 \text{ \AA}$ ,  $b = 20.7444 \text{ \AA}$ , and  $c = 4.1175 \text{ \AA}$ .

| Atom | $x/a$    | $y/b$   | $z/c$   |
|------|----------|---------|---------|
| C    | -0.04977 | 1.14634 | 0.29258 |
| C    | -0.01204 | 1.10778 | 0.27472 |
| C    | -0.03955 | 1.0392  | 0.43122 |
| C    | -0.10701 | 1.01025 | 0.59848 |
| C    | -0.14504 | 1.04857 | 0.61396 |
| C    | -0.11634 | 1.11823 | 0.46594 |
| N    | 0.31234  | 1.1499  | 0.46794 |
| C    | -0.26369 | 0.53303 | 0.49259 |
| C    | -0.30847 | 0.45708 | 0.48958 |
| C    | -0.28721 | 0.41168 | 0.65389 |
| C    | -0.21956 | 0.44534 | 0.82123 |
| C    | -0.17534 | 0.52143 | 0.82573 |
| C    | -0.19628 | 0.56684 | 0.66105 |
| C    | -0.20338 | 1.14907 | 0.66684 |
| H    | -0.02692 | 1.20204 | 0.16513 |
| H    | -0.13127 | 0.95424 | 0.7244  |
| H    | -0.20019 | 1.02369 | 0.74767 |
| H    | -0.22402 | 1.10087 | 0.84458 |
| C    | 0.45874  | 0.36486 | 0.85463 |
| H    | 0.41573  | 0.35006 | 1.05431 |
| H    | 0.43522  | 0.37078 | 0.61385 |
| H    | 0.51058  | 0.41936 | 0.91712 |
| C    | 0.58699  | 0.41828 | 0.88764 |
| H    | 0.60984  | 0.45057 | 0.65224 |
| H    | 0.63341  | 0.43756 | 1.07403 |
| H    | 0.54165  | 0.42828 | 0.98581 |
| C    | 0.40712  | 0.12309 | 0.41526 |
| H    | 0.42505  | 0.08341 | 0.51369 |
| H    | 0.39929  | 0.11586 | 0.14105 |
| H    | 0.35272  | 0.11064 | 0.53379 |

|   |          |         |         |
|---|----------|---------|---------|
| C | 0.53494  | 0.18172 | 0.76823 |
| H | 0.56011  | 0.14655 | 0.69146 |
| H | 0.47383  | 0.14416 | 0.82695 |
| H | 0.56498  | 0.21541 | 0.99255 |
| H | 0.0419   | 1.13159 | 0.13207 |
| N | 0        | 1       | 0.42    |
| B | -0.33333 | 0.33333 | 0.65134 |

**Table S12.** Atomistic coordinates for the refined unit cell parameters for BTMA-TAPA-COF via Pawley refinement. Space group:  $P3$ ;  $a = 20.7444 \text{ \AA}$ ,  $b = 20.7444 \text{ \AA}$ , and  $c = 4.1175 \text{ \AA}$ .

| Atom | $x/a$    | $y/b$   | $z/c$   |
|------|----------|---------|---------|
| C    | -0.04977 | 1.14634 | 0.29258 |
| C    | -0.01204 | 1.10778 | 0.27472 |
| C    | -0.03955 | 1.0392  | 0.43122 |
| C    | -0.10701 | 1.01025 | 0.59848 |
| C    | -0.14504 | 1.04857 | 0.61396 |
| C    | -0.11634 | 1.11823 | 0.46594 |
| N    | 0.31234  | 1.1499  | 0.46794 |
| C    | -0.26369 | 0.53303 | 0.49259 |
| C    | -0.30847 | 0.45708 | 0.48958 |
| C    | -0.28721 | 0.41168 | 0.65389 |
| C    | -0.21956 | 0.44534 | 0.82123 |
| C    | -0.17534 | 0.52143 | 0.82573 |
| C    | -0.19628 | 0.56684 | 0.66105 |
| C    | -0.20338 | 1.14907 | 0.66684 |
| H    | -0.02692 | 1.20204 | 0.16513 |
| H    | -0.13127 | 0.95424 | 0.7244  |
| H    | -0.20019 | 1.02369 | 0.74767 |
| H    | -0.22402 | 1.10087 | 0.84458 |
| C    | 0.45874  | 0.36486 | 0.85463 |
| H    | 0.41573  | 0.35006 | 1.05431 |
| H    | 0.43522  | 0.37078 | 0.61385 |
| H    | 0.51058  | 0.41936 | 0.91712 |
| C    | 0.58699  | 0.41828 | 0.88764 |
| H    | 0.60984  | 0.45057 | 0.65224 |
| H    | 0.63341  | 0.43756 | 1.07403 |
| H    | 0.54165  | 0.42828 | 0.98581 |
| C    | 0.40712  | 0.12309 | 0.41526 |
| H    | 0.42505  | 0.08341 | 0.51369 |
| H    | 0.39929  | 0.11586 | 0.14105 |
| H    | 0.35272  | 0.11064 | 0.53379 |

|   |          |         |         |
|---|----------|---------|---------|
| C | 0.53494  | 0.18172 | 0.76823 |
| H | 0.56011  | 0.14655 | 0.69146 |
| H | 0.47383  | 0.14416 | 0.82695 |
| H | 0.56498  | 0.21541 | 0.99255 |
| H | 0.0419   | 1.13159 | 0.13207 |
| N | 0        | 1       | 0.42    |
| B | -0.33333 | 0.33333 | 0.65134 |

**Table S13.** Atomistic coordinates for the AB-stacking mode of BTMA-TAPA-COF optimized by using DFTB+ method. Space group:  $P3$ ;  $a = 20.878 \text{ \AA}$ ,  $b = 20.8778 \text{ \AA}$ , and  $c = 7.7734 \text{ \AA}$ .

| Atom | $x/a$   | $y/b$   | $z/c$   |
|------|---------|---------|---------|
| C    | 0.28632 | 0.81315 | 0.10156 |
| C    | 0.32206 | 0.7726  | 0.09417 |
| C    | 0.29656 | 0.70843 | 0.19413 |
| C    | 0.23491 | 0.68617 | 0.30129 |
| C    | 0.19915 | 0.72675 | 0.30769 |
| C    | 0.22382 | 0.79054 | 0.20617 |
| C    | 0.64421 | 0.80766 | 0.20705 |
| C    | 0.06927 | 0.19989 | 0.18339 |
| C    | 0.02397 | 0.12403 | 0.18154 |
| C    | 0.04628 | 0.07815 | 0.26255 |
| C    | 0.11559 | 0.11113 | 0.34381 |
| C    | 0.16134 | 0.18693 | 0.34145 |
| C    | 0.13909 | 0.23286 | 0.2619  |
| N    | 0.12508 | 0.81191 | 0.25967 |
| C    | 0.30591 | 0.86286 | 0.02263 |
| C    | 0.37028 | 0.79061 | 0.01074 |
| C    | 0.2155  | 0.637   | 0.38213 |
| C    | 0.15255 | 0.70907 | 0.39616 |
| H    | 0.05012 | 0.23677 | 0.12047 |
| H    | 0.96805 | 0.09818 | 0.11402 |
| H    | 0.13454 | 0.07526 | 0.41256 |
| H    | 0.21814 | 0.21301 | 0.40482 |
| C    | 0.95794 | 0.15206 | 0.69045 |
| C    | 0.99387 | 0.11167 | 0.68189 |
| C    | 0.96317 | 0.04183 | 0.76054 |
| C    | 0.89466 | 0.01377 | 0.84379 |
| C    | 0.85829 | 0.05372 | 0.85013 |
| C    | 0.88999 | 0.12442 | 0.77603 |
| N    | 0.31218 | 0.14336 | 0.7733  |
| C    | 0.73367 | 0.53147 | 0.77199 |

|   |         |         |          |
|---|---------|---------|----------|
| C | 0.69095 | 0.45529 | 0.76737  |
| C | 0.71057 | 0.41179 | 0.86761  |
| C | 0.77374 | 0.44636 | 0.97216  |
| C | 0.81563 | 0.52265 | 0.97701  |
| C | 0.79664 | 0.56661 | 0.87705  |
| C | 0.80562 | 0.15813 | 0.88361  |
| H | 0.98347 | 0.20887 | 0.62733  |
| H | 0.04878 | 0.13495 | 0.61069  |
| H | 0.86807 | 0.95706 | 0.90773  |
| H | 0.8021  | 0.02933 | 0.91589  |
| C | 0.71842 | 0.56511 | 0.6927   |
| C | 0.64198 | 0.42889 | 0.68484  |
| C | 0.78949 | 0.41318 | 1.05151  |
| C | 0.86439 | 0.54889 | 1.0605   |
| H | 0.78833 | 0.11344 | 0.98617  |
| H | 0.67018 | 0.77392 | 0.16111  |
| H | 0.28056 | 0.84669 | -0.11132 |
| H | 0.36875 | 0.89218 | 0.01221  |
| H | 0.28883 | 0.90152 | 0.08474  |
| H | 0.35652 | 0.80155 | -0.12414 |
| H | 0.38588 | 0.74555 | 0.00492  |
| H | 0.41869 | 0.84351 | 0.06451  |
| H | 0.26461 | 0.63089 | 0.42305  |
| H | 0.17469 | 0.58598 | 0.3064   |
| H | 0.18697 | 0.64289 | 0.50117  |
| H | 0.13545 | 0.65158 | 0.44762  |
| H | 0.104   | 0.70747 | 0.32516  |
| H | 0.16964 | 0.74973 | 0.50791  |
| H | 0.6557  | 0.53931 | 0.69201  |
| H | 0.73891 | 0.56763 | 0.55557  |
| H | 0.74477 | 0.62343 | 0.74794  |
| H | 0.6216  | 0.36714 | 0.67551  |
| H | 0.65676 | 0.45453 | 0.55097  |

|   |         |         |         |
|---|---------|---------|---------|
| H | 0.59655 | 0.43749 | 0.74205 |
| H | 0.82186 | 0.39363 | 0.97008 |
| H | 0.7376  | 0.36318 | 1.10412 |
| H | 0.82542 | 0.44814 | 1.16304 |
| H | 0.91342 | 0.59309 | 0.98494 |
| H | 0.87791 | 0.50538 | 1.10838 |
| H | 0.85259 | 0.57551 | 1.17507 |
| B | 0.33333 | 0.66667 | 0.18782 |
| N | 0       | 0       | 0.26174 |
| N | 0       | 0       | 0.75461 |
| B | 0.66667 | 0.33333 | 0.86317 |

## Section K. Supporting references

- S1. B. Aradi, B. Hourahine and T. Frauenheim, T, *J. Phys. Chem. A.*, 2007, **111**, 5678.
- S2. <http://www.dftb.org>.
- S3. Accelrys, Material Studio Release Notes, Release 4.4, Accelrys Software, San Diego 2008.
- S4. Z. M. Gong, B. Yang, H. P. Lin, Y. Y. Tang, Z. Y. Tang, J. J. Zhang, H. M. Zhang, Y. Y. Li, Y. S. Xie, Q. Li and L. F. Chi, *ACS Nano*, 2016, **10**, 4228.
- S5. Y. Liu, X. Xu, F. K. Zheng, and Y. Cui, *Angew. Chem. Int. End.*, 2008, **47**, 4538-4541.
